## References

1. Heinemann HO, Fishman AP: Nonrespiratory functions of mammalian lung. *Physiol Rev* 49:1-47, 1969
2. Gillis CN: Metabolism of vasoactive hormones by lung. *ANESTHESIOLOGY* 39:626-632, 1973
3. Vane JR: Release and fate of vasoactive hormones in the circulation. *Br J Pharmacol* 35:209-242, 1969
4. Gillis CN, Greene NM, Cronau LH, et al: Pulmonary extraction of 5-hydroxytryptamine and norepinephrine before and after cardiopulmonary bypass in man. *Circ Res* 30:666-674, 1972
5. Eiseman B, Bryant L, Waltuch T: Metabolism of vasomotor agents by the isolated perfused lung. *J Thorac Cardiovasc Surg* 48:798-806, 1964
6. Hughes J, Gillis CN, Bloom FE: The uptake and disposition of norepinephrine in perfused rat lung. *J Pharmacol Exp Ther* 169:237-248, 1969
7. Gillis CN, Iwasawa Y: Technique for measurement of norepinephrine and 5-hydroxytryptamine uptake by rabbit lung. *J Appl Physiol* 33:404-408, 1972
8. Iwasawa Y, Gillis CN, Aghajanian G: Hypothermic inhibition of 5-hydroxytryptamine and norepinephrine uptake by lung: Cellular location of amines after uptake. *J Pharmacol Exp Ther* 186:498-507, 1973
9. Krebs HA: Body size and tissue respiration. *Biochim Biophys Acta* 4:249-269, 1950
10. Naito H, Gillis CN: Anesthetics and response of atria to sympathetic nerve stimulation. *ANESTHESIOLOGY* 29:259-266, 1968
11. Udenfriend S: *Fluorescence Assay in Biology and Medicine*. New York, Academic Press, 1962, p 146
12. Bernstein L, Weatherall M: *Statistics for Medical and Other Biological Students*. London, E. S. Livingstone, Ltd., 1952
13. Paradise RR, Griffith LK: Electrolyte content of perfused rat ventricles exposed to halothane or anoxia. *J Pharmacol Exp Ther* 154:281-288, 1966
14. Trendelenberg U: Supersensitivity by cocaine to dextrorotatory isomers of norepinephrine and epinephrine. *J Pharmacol Exp Ther* 148:329-338, 1965
15. Seeman P: The membrane actions of anesthetics and tranquilizers. *Pharmacol Rev* 24:583-655, 1972

## Obstetrics

**PRILOCAINE AND PARACERVICAL BLOCK** A paracervical block utilizing 16 ml prilocaine was performed in 51 patients in labor. The fetal ECG was monitored. The drug was administered submucosally, rather than deep into the parametria, and no needle guide was used. Eighty-seven blocks were administered to the 51 patients; 92 per cent were considered effective, and the average duration of effectiveness was 55 minutes. Fetal bradycardia, commonly reported to follow paracervical block, was not seen, but early deceleration was noted in one fetus, variable deceleration in 16, and loss of ripple pattern in nine. Five of the fetuses with variable deceleration showed the pattern before the block was given. Six of 51 infants had one-minute Apgar scores below 7. (Bloom, S. L., Horswill, C. W., and Curet, L. B.: *Effects of Paracervical Blocks on the Fetus during Labor: A Prospective Study with the Use of Direct Fetal Monitoring*. *Am. J. Obstet. Gynecol.* 114:218, 1972.) **ABSTRACTER'S COMMENT:** It would appear that fetal bradycardia can be avoided if the technique of paracervical block is modified. Although abnormalities in the heart rate appeared, they were probably not of anesthetic origin. Two modifications of the usual paracervical block were introduced (the use of prilocaine rather than mepivacaine or lidocaine and the shallow injection) so that the source of the improved results is not immediately clear. Probably prilocaine is safer than mepivacaine or lidocaine, as it is detoxified more rapidly.
